# Supplementary material for: Modulation of Cadmium Tolerance in Rice: Insight into Vanillic Acid-Induced Upregulation of Antioxidant Defense and Glyoxalase Systems
Source: PubMed Central journal article supplement (PMC7076431; doi:10.3390/plants9020188), 2020-02-04
Supplement: plants-09-00188-s001.pdf [file plants-09-00188-s001.pdf]

Table S1a. Correlation matrix of plant growth, osmotic status, photosynthetic pigments contents, Oxidative stress indicator, antioxidants and minerals contents

|                               | Plant height         | RSE                  | Root length         | RRE                 | Shoot FW             | Root FW              | Shoot DW             | Root DW              | Leaf RWC             | Pro                  | Chl <i>a</i>         | Chl <i>b</i>         | Chl ( <i>a+b</i> )   | car                  |
|-------------------------------|----------------------|----------------------|---------------------|---------------------|----------------------|----------------------|----------------------|----------------------|----------------------|----------------------|----------------------|----------------------|----------------------|----------------------|
| Plant height                  | 1                    |                      |                     |                     |                      |                      |                      |                      |                      |                      |                      |                      |                      |                      |
| RSE                           | 0.887**              | 1                    |                     |                     |                      |                      |                      |                      |                      |                      |                      |                      |                      |                      |
| Root length                   | 0.852**              | 0.814**              | 1                   |                     |                      |                      |                      |                      |                      |                      |                      |                      |                      |                      |
| RRE                           | 0.748**              | 0.871**              | 0.926**             | 1                   |                      |                      |                      |                      |                      |                      |                      |                      |                      |                      |
| Shoot FW                      | 0.554*               | 0.643**              | 0.684**             | 0.727**             | 1                    |                      |                      |                      |                      |                      |                      |                      |                      |                      |
| Root FW                       | 0.588*               | 0.672**              | 0.505*              | 0.539*              | 0.865**              | 1                    |                      |                      |                      |                      |                      |                      |                      |                      |
| Shoot DW                      | 0.554*               | 0.643**              | 0.684**             | 0.727**             | 1.000**              | 0.865**              | 1                    |                      |                      |                      |                      |                      |                      |                      |
| Root DW                       | 0.588*               | 0.672**              | 0.505*              | 0.539*              | 0.865**              | 1.000**              | 0.865**              | 1                    |                      |                      |                      |                      |                      |                      |
| Leaf RWC                      | 0.815**              | 0.919**              | 0.857**             | 0.892**             | 0.778**              | 0.745**              | 0.778**              | 0.745**              | 1                    |                      |                      |                      |                      |                      |
| Pro                           | -0.849**             | -0.982**             | -0.844**            | -0.920**            | -0.641**             | -0.635**             | -0.641**             | -0.635**             | -0.930**             | 1                    |                      |                      |                      |                      |
| Chl <i>a</i>                  | 0.845**              | 0.969**              | 0.833**             | 0.891**             | 0.719**              | 0.695**              | 0.719**              | 0.695**              | 0.963**              | -0.971**             | 1                    |                      |                      |                      |
| Chl <i>b</i>                  | 0.793**              | 0.911**              | 0.909**             | 0.967**             | 0.784**              | 0.646**              | 0.784**              | 0.646**              | 0.966**              | -0.942**             | 0.960**              | 1                    |                      |                      |
| Chl ( <i>a+b</i> )            | 0.839**              | 0.963**              | 0.857**             | 0.916**             | 0.740**              | 0.689**              | 0.740**              | 0.689**              | 0.971**              | -0.971**             | 0.998**              | 0.977**              | 1                    |                      |
| car                           | 0.786**              | 0.902**              | 0.890**             | 0.943**             | 0.811**              | 0.689**              | 0.811**              | 0.689**              | 0.961**              | -0.926**             | 0.962**              | 0.988**              | 0.975**              | 1                    |
| MDA                           | -0.801**             | -0.933**             | -0.851**            | -0.934**            | -0.608**             | -0.521*              | -0.608**             | -0.521*              | -0.895**             | 0.970**              | -0.934**             | -0.943**             | -0.943**             | -0.896**             |
| H <sub>2</sub> O <sub>2</sub> | -0.837**             | -0.972**             | -0.863**            | -0.942**            | -0.671**             | -0.607**             | -0.671**             | -0.607**             | -0.929**             | 0.991**              | -0.977**             | -0.964**             | -0.981**             | -0.945**             |
| LOX                           | -0.718**             | -0.839**             | -0.832**            | -0.911**            | -0.587*              | -0.409 <sup>ns</sup> | -0.587*              | -0.409 <sup>ns</sup> | -0.833**             | 0.884**              | -0.853**             | -0.906**             | -0.871**             | -0.833**             |
| EL Shoot                      | -0.812**             | -0.946**             | -0.884**            | -0.961**            | -0.716**             | -0.601**             | -0.716**             | -0.601**             | -0.926**             | 0.972**              | -0.972**             | -0.980**             | -0.980**             | -0.970**             |
| EL Root                       | -0.837**             | -0.973**             | -0.746**            | -0.827**            | -0.551*              | -0.601**             | -0.551*              | -0.601**             | -0.864**             | 0.973**              | -0.956**             | -0.871**             | -0.943**             | -0.865**             |
| AsA                           | 0.752**              | 0.874**              | 0.925**             | 0.994**             | 0.759**              | 0.573*               | 0.759**              | 0.573*               | 0.916**              | -0.922**             | 0.910**              | 0.983**              | 0.934**              | 0.964**              |
| DHA                           | -0.832**             | -0.967**             | -0.861**            | -0.940**            | -0.683**             | -0.603**             | -0.683**             | -0.603**             | -0.922**             | 0.983**              | -0.979**             | -0.964**             | -0.983**             | -0.951**             |
| AsA:DHA                       | 0.707**              | 0.824**              | 0.922**             | 0.990**             | 0.760**              | 0.523*               | 0.760**              | 0.523*               | 0.878**              | -0.875**             | 0.862**              | 0.963**              | 0.892**              | 0.937**              |
| GSH                           | -0.185 <sup>ns</sup> | -0.246 <sup>ns</sup> | -0.611**            | -0.670**            | -0.470 <sup>ns</sup> | -0.036 <sup>ns</sup> | -0.470*              | -0.036 <sup>ns</sup> | -0.339 <sup>ns</sup> | 0.347 <sup>ns</sup>  | -0.297 <sup>ns</sup> | -0.530*              | -0.354 <sup>ns</sup> | -0.500*              |
| GSSG                          | -0.849**             | -0.982**             | -0.800**            | -0.874**            | -0.616**             | -0.662**             | -0.616**             | -0.662**             | -0.905**             | 0.988**              | -0.962**             | -0.903**             | -0.955**             | -0.905**             |
| GSH:GSSG                      | 0.802**              | 0.913**              | 0.629**             | 0.675**             | 0.551*               | 0.734**              | 0.551*               | 0.734**              | 0.833**              | -0.880**             | 0.895**              | 0.761**              | 0.870**              | 0.801**              |
| NPT                           | -0.145 <sup>ns</sup> | -0.195 <sup>ns</sup> | -0.567*             | -0.623**            | -0.373 <sup>ns</sup> | 0.042 <sup>ns</sup>  | -0.373 <sup>ns</sup> | 0.042 <sup>ns</sup>  | -0.294 <sup>ns</sup> | 0.305 <sup>ns</sup>  | -0.223 <sup>ns</sup> | -0.470*              | -0.282 <sup>ns</sup> | -0.404 <sup>ns</sup> |
| PC                            | -0.095 <sup>ns</sup> | -0.131 <sup>ns</sup> | -0.484*             | -0.532*             | -0.250 <sup>ns</sup> | 0.116 <sup>ns</sup>  | -0.250 <sup>ns</sup> | 0.116 <sup>ns</sup>  | -0.229 <sup>ns</sup> | 0.241 <sup>ns</sup>  | -0.133 <sup>ns</sup> | -0.378 <sup>ns</sup> | -0.191 <sup>ns</sup> | -0.279 <sup>ns</sup> |
| SOD                           | -0.106 <sup>ns</sup> | -0.154 <sup>ns</sup> | -0.489*             | -0.553*             | -0.241 <sup>ns</sup> | 0.154 <sup>ns</sup>  | -0.241 <sup>ns</sup> | 0.154 <sup>ns</sup>  | -0.206 <sup>ns</sup> | 0.258 <sup>ns</sup>  | -0.150 <sup>ns</sup> | -0.385 <sup>ns</sup> | -0.206 <sup>ns</sup> | -0.291 <sup>ns</sup> |
| CAT                           | 0.845**              | 0.951**              | 0.877**             | 0.921**             | 0.708**              | 0.608**              | 0.708**              | 0.608**              | 0.903**              | -0.941**             | 0.954**              | 0.940**              | 0.958**              | 0.936**              |
| GPX                           | -0.270 <sup>ns</sup> | -0.336 <sup>ns</sup> | -0.647**            | -0.709**            | -0.428 <sup>ns</sup> | -0.021 <sup>ns</sup> | -0.428 <sup>ns</sup> | -0.021 <sup>ns</sup> | -0.421 <sup>ns</sup> | 0.433 <sup>ns</sup>  | -0.366 <sup>ns</sup> | -0.587*              | -0.420 <sup>ns</sup> | -0.501*              |
| GST                           | 0.448 <sup>ns</sup>  | 0.494*               | 0.061 <sup>ns</sup> | 0.060 <sup>ns</sup> | 0.129 <sup>ns</sup>  | 0.501*               | 0.129 <sup>ns</sup>  | 0.501*               | 0.382 <sup>ns</sup>  | -0.409 <sup>ns</sup> | 0.483*               | 0.231 <sup>ns</sup>  | 0.428 <sup>ns</sup>  | 0.297 <sup>ns</sup>  |

|          | Plant height         | RSE                  | Root length          | RRE                  | Shoot FW             | Root FW              | Shoot DW             | Root DW              | Leaf RWC             | Pro                  | Chl <i>a</i>         | Chl <i>b</i>         | Chl ( <i>a+b</i> )   | car                  |
|----------|----------------------|----------------------|----------------------|----------------------|----------------------|----------------------|----------------------|----------------------|----------------------|----------------------|----------------------|----------------------|----------------------|----------------------|
| APX      | -0.272 <sup>ns</sup> | -0.332 <sup>ns</sup> | -0.576 <sup>*</sup>  | -0.639 <sup>**</sup> | -0.286 <sup>ns</sup> | 0.020 <sup>ns</sup>  | -0.286 <sup>ns</sup> | 0.020 <sup>ns</sup>  | -0.383 <sup>ns</sup> | 0.426 <sup>ns</sup>  | -0.311 <sup>ns</sup> | -0.509 <sup>*</sup>  | -0.360 <sup>ns</sup> | -0.390 <sup>ns</sup> |
| MDHAR    | -0.004 <sup>ns</sup> | -0.034 <sup>ns</sup> | -0.451 <sup>ns</sup> | -0.494 <sup>*</sup>  | -0.328 <sup>ns</sup> | 0.145 <sup>ns</sup>  | -0.328 <sup>ns</sup> | 0.145 <sup>ns</sup>  | -0.159 <sup>ns</sup> | 0.140 <sup>ns</sup>  | -0.097 <sup>ns</sup> | -0.355 <sup>ns</sup> | -0.158 <sup>ns</sup> | -0.300 <sup>ns</sup> |
| DHAR     | 0.685 <sup>**</sup>  | 0.771 <sup>**</sup>  | 0.409 <sup>ns</sup>  | 0.435 <sup>ns</sup>  | 0.392 <sup>ns</sup>  | 0.690 <sup>**</sup>  | 0.392 <sup>ns</sup>  | 0.690 <sup>**</sup>  | 0.676 <sup>**</sup>  | -0.715 <sup>**</sup> | 0.746 <sup>**</sup>  | 0.556 <sup>*</sup>   | 0.707 <sup>**</sup>  | 0.615 <sup>**</sup>  |
| GR       | -0.202 <sup>ns</sup> | -0.256 <sup>ns</sup> | -0.540 <sup>*</sup>  | -0.603 <sup>**</sup> | -0.252 <sup>ns</sup> | 0.045 <sup>ns</sup>  | -0.252 <sup>ns</sup> | 0.045 <sup>ns</sup>  | -0.294 <sup>ns</sup> | 0.357 <sup>ns</sup>  | -0.213 <sup>ns</sup> | -0.429 <sup>ns</sup> | -0.265 <sup>ns</sup> | -0.332 <sup>ns</sup> |
| Gly I    | 0.450 <sup>ns</sup>  | 0.500 <sup>*</sup>   | 0.060 <sup>ns</sup>  | 0.068 <sup>ns</sup>  | 0.133 <sup>ns</sup>  | 0.474 <sup>*</sup>   | 0.133 <sup>ns</sup>  | 0.474 <sup>*</sup>   | 0.362 <sup>ns</sup>  | -0.405 <sup>ns</sup> | 0.486 <sup>*</sup>   | 0.231 <sup>ns</sup>  | 0.430 <sup>ns</sup>  | 0.300 <sup>ns</sup>  |
| Gly II   | 0.158 <sup>ns</sup>  | 0.156 <sup>ns</sup>  | -0.219 <sup>ns</sup> | -0.253 <sup>ns</sup> | 0.010 <sup>ns</sup>  | 0.335 <sup>ns</sup>  | 0.010 <sup>ns</sup>  | 0.335 <sup>ns</sup>  | 0.061 <sup>ns</sup>  | -0.031 <sup>ns</sup> | 0.160 <sup>ns</sup>  | -0.086 <sup>ns</sup> | 0.103 <sup>ns</sup>  | 0.015 <sup>ns</sup>  |
| MG       | -0.763 <sup>**</sup> | -0.894 <sup>**</sup> | -0.902 <sup>**</sup> | -0.985 <sup>**</sup> | -0.698 <sup>**</sup> | -0.517 <sup>*</sup>  | -0.698 <sup>**</sup> | -0.517 <sup>*</sup>  | -0.888 <sup>**</sup> | 0.939 <sup>**</sup>  | -0.918 <sup>**</sup> | -0.971 <sup>**</sup> | -0.937 <sup>**</sup> | -0.942 <sup>**</sup> |
| BCF      | -0.345 <sup>ns</sup> | -0.415 <sup>ns</sup> | -0.731 <sup>**</sup> | -0.786 <sup>**</sup> | -0.531 <sup>*</sup>  | -0.154 <sup>ns</sup> | -0.531 <sup>*</sup>  | -0.154 <sup>ns</sup> | -0.526 <sup>*</sup>  | 0.513 <sup>*</sup>   | -0.448 <sup>ns</sup> | -0.670 <sup>**</sup> | -0.504 <sup>*</sup>  | -0.604 <sup>**</sup> |
| BAC      | -0.308 <sup>ns</sup> | -0.371 <sup>ns</sup> | -0.689 <sup>**</sup> | -0.742 <sup>**</sup> | -0.469 <sup>*</sup>  | -0.110 <sup>ns</sup> | -0.469 <sup>*</sup>  | -0.110 <sup>ns</sup> | -0.480 <sup>*</sup>  | 0.471 <sup>*</sup>   | -0.389 <sup>ns</sup> | -0.616 <sup>**</sup> | -0.445 <sup>ns</sup> | -0.537 <sup>*</sup>  |
| TF       | -0.488 <sup>*</sup>  | -0.579               | -0.825 <sup>**</sup> | -0.889 <sup>**</sup> | -0.613 <sup>**</sup> | -0.278 <sup>ns</sup> | -0.613 <sup>**</sup> | -0.278 <sup>ns</sup> | -0.668 <sup>**</sup> | 0.667 <sup>**</sup>  | -0.610 <sup>**</sup> | -0.797 <sup>**</sup> | -0.658 <sup>**</sup> | -0.738 <sup>**</sup> |
| Cd Shoot | -0.368 <sup>ns</sup> | -0.431 <sup>ns</sup> | -0.632 <sup>**</sup> | -0.681 <sup>**</sup> | -0.389 <sup>ns</sup> | -0.099 <sup>ns</sup> | -0.389 <sup>ns</sup> | -0.099 <sup>ns</sup> | -0.524 <sup>*</sup>  | 0.509 <sup>*</sup>   | -0.446 <sup>ns</sup> | -0.616 <sup>**</sup> | -0.489 <sup>*</sup>  | -0.495 <sup>*</sup>  |
| Root Cd  | -0.439 <sup>ns</sup> | -0.509 <sup>*</sup>  | -0.692 <sup>**</sup> | -0.743 <sup>**</sup> | -0.453 <sup>ns</sup> | -0.176 <sup>ns</sup> | -0.453 <sup>ns</sup> | -0.176 <sup>ns</sup> | -0.600 <sup>**</sup> | 0.584 <sup>*</sup>   | -0.526 <sup>*</sup>  | -0.687 <sup>**</sup> | -0.567 <sup>*</sup>  | -0.573 <sup>*</sup>  |
| Shoot K  | 0.593 <sup>**</sup>  | 0.655 <sup>**</sup>  | 0.291 <sup>ns</sup>  | 0.297 <sup>ns</sup>  | 0.254 <sup>ns</sup>  | 0.504 <sup>*</sup>   | 0.254 <sup>ns</sup>  | 0.504 <sup>*</sup>   | 0.491 <sup>*</sup>   | -0.566 <sup>*</sup>  | 0.628 <sup>**</sup>  | 0.407 <sup>ns</sup>  | 0.580 <sup>*</sup>   | 0.482 <sup>*</sup>   |
| Root K   | 0.591 <sup>**</sup>  | 0.694 <sup>**</sup>  | 0.878 <sup>**</sup>  | 0.946 <sup>**</sup>  | 0.681 <sup>**</sup>  | 0.382 <sup>ns</sup>  | 0.681 <sup>**</sup>  | 0.382 <sup>ns</sup>  | 0.774 <sup>**</sup>  | -0.777 <sup>**</sup> | 0.747 <sup>**</sup>  | 0.893 <sup>**</sup>  | 0.786 <sup>**</sup>  | 0.854 <sup>**</sup>  |
| Shoot Ca | 0.686 <sup>**</sup>  | 0.781 <sup>**</sup>  | 0.476 <sup>*</sup>   | 0.508 <sup>*</sup>   | 0.414 <sup>ns</sup>  | 0.604 <sup>**</sup>  | 0.414 <sup>ns</sup>  | 0.604 <sup>**</sup>  | 0.652 <sup>**</sup>  | -0.728 <sup>**</sup> | 0.768 <sup>**</sup>  | 0.599 <sup>**</sup>  | 0.734 <sup>**</sup>  | 0.675 <sup>**</sup>  |
| Root Ca  | 0.777 <sup>**</sup>  | 0.836 <sup>**</sup>  | 0.561 <sup>*</sup>   | 0.572 <sup>*</sup>   | 0.191 <sup>ns</sup>  | 0.407 <sup>ns</sup>  | 0.191 <sup>ns</sup>  | 0.407 <sup>ns</sup>  | 0.682 <sup>**</sup>  | -0.826 <sup>**</sup> | 0.772 <sup>**</sup>  | 0.626 <sup>**</sup>  | 0.743 <sup>**</sup>  | 0.612 <sup>**</sup>  |
| Shoot Mg | 0.737 <sup>**</sup>  | 0.841 <sup>**</sup>  | 0.929 <sup>**</sup>  | 0.993 <sup>**</sup>  | 0.721 <sup>**</sup>  | 0.518 <sup>ns</sup>  | 0.721 <sup>**</sup>  | 0.518 <sup>ns</sup>  | 0.876 <sup>**</sup>  | -0.896 <sup>**</sup> | 0.860 <sup>**</sup>  | 0.955 <sup>**</sup>  | 0.888 <sup>**</sup>  | 0.922 <sup>**</sup>  |
| Root Mg  | 0.774 <sup>**</sup>  | 0.930 <sup>**</sup>  | 0.854 <sup>**</sup>  | 0.946 <sup>**</sup>  | 0.620 <sup>**</sup>  | 0.528 <sup>ns</sup>  | 0.620 <sup>**</sup>  | 0.528 <sup>ns</sup>  | 0.872 <sup>**</sup>  | -0.948 <sup>**</sup> | 0.915 <sup>**</sup>  | 0.921 <sup>**</sup>  | 0.923 <sup>**</sup>  | 0.918 <sup>**</sup>  |

\*\*Significant at  $P \leq 0.01$ ; \*Significant at  $P \leq 0.05$ .

<sup>ns</sup>Non-significant.

Table S1b. Correlation matrix of oxidative stress indicators, the AsA:GSH cycle and enzymatic antioxidants

|                               | MDA                  | H <sub>2</sub> O <sub>2</sub> | LOX                  | Shoot EL             | Root EL              | AsA                  | DHA                  | AsA:DHA              | GSH                  | GSSG                | GSH:GSSG            | SOD                  | CAT                  | GPX                 | GST     | APX                 | MDHAR   | DHAR                | GR |  |
|-------------------------------|----------------------|-------------------------------|----------------------|----------------------|----------------------|----------------------|----------------------|----------------------|----------------------|---------------------|---------------------|----------------------|----------------------|---------------------|---------|---------------------|---------|---------------------|----|--|
| MDA                           | 1                    |                               |                      |                      |                      |                      |                      |                      |                      |                     |                     |                      |                      |                     |         |                     |         |                     |    |  |
| H <sub>2</sub> O <sub>2</sub> | 0.980**              | 1                             |                      |                      |                      |                      |                      |                      |                      |                     |                     |                      |                      |                     |         |                     |         |                     |    |  |
| LOX                           | 0.968**              | 0.917**                       | 1                    |                      |                      |                      |                      |                      |                      |                     |                     |                      |                      |                     |         |                     |         |                     |    |  |
| Shoot EL                      | 0.965**              | 0.992**                       | 0.909**              | 1                    |                      |                      |                      |                      |                      |                     |                     |                      |                      |                     |         |                     |         |                     |    |  |
| Root EL                       | 0.930**              | 0.964**                       | 0.821**              | 0.935**              | 1                    |                      |                      |                      |                      |                     |                     |                      |                      |                     |         |                     |         |                     |    |  |
| AsA                           | -0.935**             | -0.946**                      | -0.910**             | -0.969**             | -0.832**             | 1                    |                      |                      |                      |                     |                     |                      |                      |                     |         |                     |         |                     |    |  |
| DHA                           | 0.972**              | 0.998**                       | 0.909**              | 0.995**              | 0.960**              | -0.945**             | 1                    |                      |                      |                     |                     |                      |                      |                     |         |                     |         |                     |    |  |
| AsA:DHA                       | -0.906**             | -0.909**                      | -0.907**             | -0.940**             | -0.768**             | 0.992**              | -0.911*              | 1                    |                      |                     |                     |                      |                      |                     |         |                     |         |                     |    |  |
| GSH                           | 0.447 <sup>ns</sup>  | 0.411 <sup>ns</sup>           | 0.537**              | 0.493**              | 0.191 <sup>ns</sup>  | -0.656**             | 0.421 <sup>ns</sup>  | -0.727**             | 1                    |                     |                     |                      |                      |                     |         |                     |         |                     |    |  |
| GSSG                          | 0.925**              | 0.969**                       | 0.806**              | 0.947**              | 0.982**              | -0.876**             | 0.963**              | -0.818**             | 0.265 <sup>ns</sup>  | 1                   |                     |                      |                      |                     |         |                     |         |                     |    |  |
| GSH:GSSG                      | -0.750**             | -0.841**                      | -0.578*              | -0.807**             | -0.919**             | 0.689**              | -0.837*              | 0.605**              | 0.039 <sup>ns</sup>  | -0.934**            | 1                   |                      |                      |                     |         |                     |         |                     |    |  |
| SOD                           | 0.421 <sup>ns</sup>  | 0.312 <sup>ns</sup>           | 0.570 <sup>ns</sup>  | 0.352 <sup>ns</sup>  | 0.098 <sup>ns</sup>  | -0.519 <sup>ns</sup> | 0.303 <sup>ns</sup>  | -0.601**             | 0.891**              | 0.142 <sup>ns</sup> | 0.212 <sup>ns</sup> | 1                    |                      |                     |         |                     |         |                     |    |  |
| CAT                           | -0.915**             | -0.964**                      | -0.861**             | -0.965**             | -0.912**             | 0.920**              | -0.971**             | 0.898**              | -0.416 <sup>ns</sup> | -0.926**            | 0.819**             | -0.282 <sup>ns</sup> | 1                    |                     |         |                     |         |                     |    |  |
| GPX                           | 0.588*               | 0.496*                        | 0.726**              | 0.542*               | 0.275 <sup>ns</sup>  | -0.691**             | 0.492*               | -0.762**             | 0.914**              | 0.314 <sup>ns</sup> | 0.030 <sup>ns</sup> | 0.966**              | -0.470*              | 1                   |         |                     |         |                     |    |  |
| GST                           | -0.255 <sup>ns</sup> | -0.356 <sup>ns</sup>          | -0.067 <sup>ns</sup> | -0.298 <sup>ns</sup> | -0.560*              | 0.091 <sup>ns</sup>  | -0.358 <sup>ns</sup> | -0.020 <sup>ns</sup> | 0.644**              | -0.506*             | 0.757**             | 0.766**              | 0.337 <sup>ns</sup>  | 0.626**             | 1       |                     |         |                     |    |  |
| APX                           | 0.588*               | 0.460 <sup>ns</sup>           | 0.726**              | 0.468 <sup>ns</sup>  | 0.269 <sup>ns</sup>  | -0.609**             | 0.439 <sup>ns</sup>  | -0.670**             | 0.763**              | 0.302 <sup>ns</sup> | 0.039 <sup>ns</sup> | 0.946**              | -0.400 <sup>ns</sup> | 0.946**             | 0.593** | 1                   |         |                     |    |  |
| MDHAR                         | 0.292 <sup>ns</sup>  | 0.217 <sup>ns</sup>           | 0.443 <sup>ns</sup>  | 0.299 <sup>ns</sup>  | -0.021 <sup>ns</sup> | -0.481*              | 0.226 <sup>ns</sup>  | -0.573*              | 0.956**              | 0.031 <sup>ns</sup> | 0.290 <sup>ns</sup> | 0.933**              | -0.220 <sup>ns</sup> | 0.925**             | 0.804** | 0.798**             | 1       |                     |    |  |
| DHAR                          | -0.552*              | -0.657**                      | -0.350 <sup>ns</sup> | -0.609**             | -0.797**             | 0.455 <sup>ns</sup>  | -0.653**             | 0.352 <sup>ns</sup>  | 0.310 <sup>ns</sup>  | -0.798**            | 0.957**             | 0.478*               | 0.633**              | 0.314 <sup>ns</sup> | 0.903** | 0.299 <sup>ns</sup> | 0.547*  | 1                   |    |  |
| GR                            | 0.483*               | 0.377 <sup>ns</sup>           | 0.593**              | 0.394 <sup>ns</sup>  | 0.183 <sup>ns</sup>  | -0.562*              | 0.355 <sup>ns</sup>  | -0.627**             | 0.824**              | 0.254 <sup>ns</sup> | 0.080 <sup>ns</sup> | 0.961**              | -0.329 <sup>ns</sup> | 0.919**             | 0.674** | 0.959**             | 0.828** | 0.337 <sup>ns</sup> | 1  |  |

\*\*Significant at  $P \leq 0.01$ ; \*Significant at  $P \leq 0.05$ .

<sup>ns</sup>Non-significant.

Table S1c. Correlation matrix of the components of glyoxalase systems, Cd accumulation and translocation, other essential mineral components

|          | Gly I                | Gly II              | MG                   | NPT                  | PC                   | BCF                  | BAC                  | TF                   | Shoot Cd             | Root Cd              | Shoot K             | Root K              | Shoot Ca            | Root Ca | Shoot Mg | Root Mg |
|----------|----------------------|---------------------|----------------------|----------------------|----------------------|----------------------|----------------------|----------------------|----------------------|----------------------|---------------------|---------------------|---------------------|---------|----------|---------|
| Gly I    | 1                    |                     |                      |                      |                      |                      |                      |                      |                      |                      |                     |                     |                     |         |          |         |
| Gly II   | 0.899**              | 1                   |                      |                      |                      |                      |                      |                      |                      |                      |                     |                     |                     |         |          |         |
| MG       | -0.135 <sup>ns</sup> | 0.213 <sup>ns</sup> | 1                    |                      |                      |                      |                      |                      |                      |                      |                     |                     |                     |         |          |         |
| NPT      | 0.727**              | 0.871**             | 0.574*               | 1                    |                      |                      |                      |                      |                      |                      |                     |                     |                     |         |          |         |
| PC       | 0.782**              | 0.941**             | 0.486*               | 0.964**              | 1                    |                      |                      |                      |                      |                      |                     |                     |                     |         |          |         |
| BCF      | 0.557*               | 0.764**             | 0.740**              | 0.966**              | 0.926**              | 1                    |                      |                      |                      |                      |                     |                     |                     |         |          |         |
| BAC      | 0.608**              | 0.815**             | 0.692**              | 0.968**              | 0.958**              | 0.993**              | 1                    |                      |                      |                      |                     |                     |                     |         |          |         |
| TF       | 0.388 <sup>ns</sup>  | 0.647**             | 0.855**              | 0.905**              | 0.851**              | 0.981**              | 0.963**              | 1                    |                      |                      |                     |                     |                     |         |          |         |
| Shoot Cd | 0.452 <sup>ns</sup>  | 0.719**             | 0.681**              | 0.796**              | 0.867**              | 0.865**              | 0.889**              | 0.860**              | 1                    |                      |                     |                     |                     |         |          |         |
| Root Cd  | 0.387 <sup>ns</sup>  | 0.673**             | 0.743**              | 0.786**              | 0.844**              | 0.875**              | 0.892**              | 0.886**              | 0.995**              | 1                    |                     |                     |                     |         |          |         |
| Shoot K  | 0.936**              | 0.810**             | -0.338 <sup>ns</sup> | 0.521*               | 0.624**              | 0.342 <sup>ns</sup>  | 0.407 <sup>ns</sup>  | 0.164 <sup>ns</sup>  | 0.345 <sup>ns</sup>  | 0.269 <sup>ns</sup>  | 1                   |                     |                     |         |          |         |
| Root K   | -0.202 <sup>ns</sup> | -0.496*             | -0.933**             | -0.807**             | -0.722**             | -0.916**             | -0.878**             | -0.972**             | -0.790**             | -0.833**             | 0.012 <sup>ns</sup> | 1                   |                     |         |          |         |
| Shoot Ca | 0.834**              | 0.635**             | -0.539*              | 0.293 <sup>ns</sup>  | 0.429 <sup>ns</sup>  | 0.106 <sup>ns</sup>  | 0.179 <sup>ns</sup>  | -0.076 <sup>ns</sup> | 0.201 <sup>ns</sup>  | 0.112 <sup>ns</sup>  | 0.942**             | 0.263 <sup>ns</sup> | 1                   |         |          |         |
| Root Ca  | 0.666**              | 0.300*              | -0.624**             | 0.138 <sup>ns</sup>  | 0.135 <sup>ns</sup>  | -0.056 <sup>ns</sup> | -0.039 <sup>ns</sup> | -0.227 <sup>ns</sup> | -0.184 <sup>ns</sup> | -0.249 <sup>ns</sup> | 0.731**             | 0.362 <sup>ns</sup> | 0.786**             | 1       |          |         |
| Shoot Mg | -0.006 <sup>ns</sup> | -0.330*             | -0.976**             | -0.675**             | -0.596**             | -0.828**             | -0.791**             | -0.919**             | -0.730**             | -0.788**             | 0.214 <sup>ns</sup> | 0.966**             | 0.438 <sup>ns</sup> | 0.535*  | 1        |         |
| Root Mg  | 0.288 <sup>ns</sup>  | -0.026*             | -0.936**             | -0.420 <sup>ns</sup> | -0.317 <sup>ns</sup> | -0.599**             | -0.549*              | -0.732**             | -0.489*              | -0.560*              | 0.528*              | 0.812**             | 0.697**             | 0.706** | 0.917**  | 1       |

\*\*Significant at  $P \leq 0.01$ ; \*Significant at  $P \leq 0.05$ .

<sup>ns</sup>Non-significant.
